# Supplementary material
Source: PubMed Central journal article supplement (PMC2664015)
Supplement: 0812947106_0812947106SI.pdf [file 0812947106_0812947106SI.pdf]

# Supporting Information

Campbell and Feinberg 10.1073/pnas.0812947106

Table S1. Coefficient estimates and 95% CIs for cubic and Gompertz functions describing the age-related declines in delta and theta power density

| Coefficient                             | Estimate | SE     | 95% CI              |
|-----------------------------------------|----------|--------|---------------------|
| Delta power density, cubic function*    |          |        |                     |
| A                                       | 0.2530   | 0.0434 | 0.1678–0.3381       |
| B                                       | –3.605   | 0.633  | (–4.849)–(–2.361)   |
| C                                       | 6.322    | 2.755  | 0.911–11.734        |
| D                                       | 74.15    | 4.13   | 65.88–82.41         |
| Theta power density, cubic function*    |          |        |                     |
| A                                       | 0.0183   | 0.0052 | 0.0081–0.0284       |
| B                                       | –0.2176  | 0.0755 | (–0.3659)–(–0.0693) |
| C                                       | –0.2565  | 0.3242 | (–0.8935)–0.3805    |
| D                                       | 9.895    | 0.524  | 8.847–10.943        |
| Delta power density, Gompertz function† |          |        |                     |
| D                                       | 76.85    | 3.60   | 69.64–84.05         |
| A                                       | 66.92    | 5.83   | 55.24–78.60         |
| C                                       | 0.4416   | 0.0484 | 0.3447–0.5385       |
| M                                       | 13.54    | 0.18   | 13.19–13.90         |
| Theta power density, Gompertz function† |          |        |                     |
| D                                       | 10.48    | 0.66   | 9.16–11.81          |
| A                                       | 8.76     | 1.03   | 6.70–10.82          |
| C                                       | 0.3465   | 0.0504 | 0.2456–0.4475       |
| M                                       | 12.33    | 0.29   | 11.75–12.91         |

\*, Power density =  $A*(age-9)^3 + B*(age-9)^2 + C*(age-9) + D$ . Starting age, 9 years, subtracted to "center" data. †, Power density =  $D - A*e^{-C*(age-M)}$ . D, upper asymptote; A, drop to lower asymptote; C, decline rate; M, age of peak decline.
